# Supplementary material for: Superhydrophobic attapulgite-based films for the selective separation of oils and organic solvents from water
Source: Royal Society of Chemistry journal article supplement (doi:10.1039/c5ra21791a), 2015-01-01
Supplement: c5ra21791a1.pdf [file c5ra21791a1.pdf]

## Supporting Information

### The separation efficiency of PAT-film.

The oil/water separation efficiency (taking chloroform and water mixture as an example) was investigated and calculated according to  $\eta = (m_1/m_0) \times 100\%$  [1], where  $m_0$  and  $m_1$  are the mass of the water before and after separation. The separation efficiency of the PAT-film was calculated to be ca. 91%.

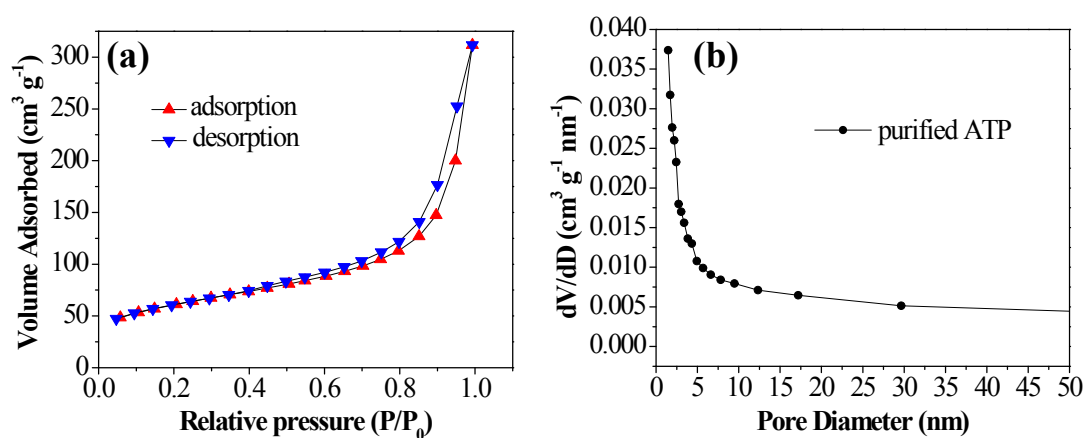

**Figure S1.** (a) Nitrogen adsorption-desorption isotherms of purified ATP measured at 77 K. (b) BJH pore size distribution curves of purified ATP.

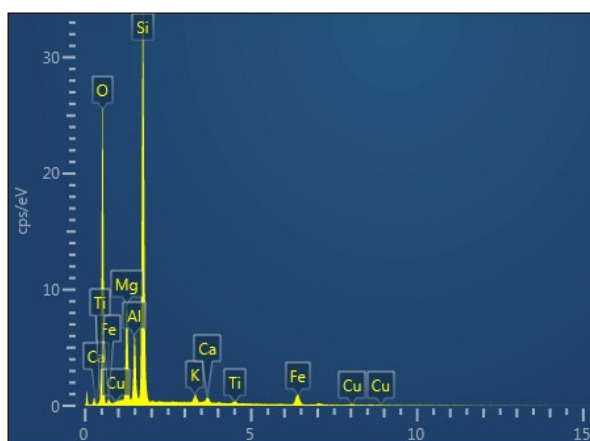

**Figure S2.** The energy dispersive spectrometry (EDS) of the purified ATP.

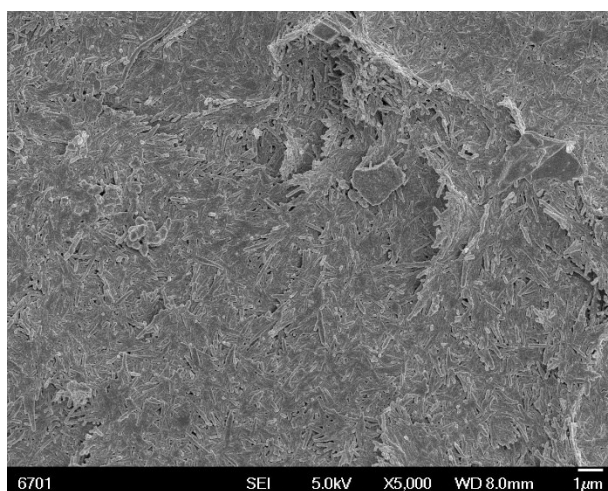

**Figure S3.** The SEM images of the PAT-film. Scale bar: 1µm.

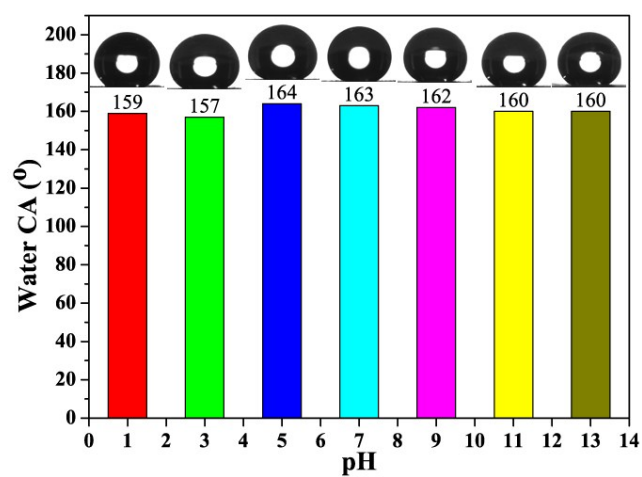

**Figure S4.** The water contact angle measurement with different PH value for the PAT-film.

#### References

1. J. Li, L. Yan, J. Li, F. Zha. and Z. Lei, *RSC Adv.*, 2015, **5**, 53802.
